# Supplementary material for: In situ Hg2+ improved the peroxidase-like activity and triggered “ON” the oxidase-like activity of yolk–shell Co3S4 microspheres for the detection of Hg2+
Source: Royal Society of Chemistry journal article supplement (doi:10.1039/d3an01705b), 2023-12-07
Supplement: d3an01705b1.pdf [file d3an01705b1.pdf]

1 **Supporting Information**

2 **In Situ Hg<sup>2+</sup> Improved Peroxidase-like Activity and Triggered “on”**  
3 **Oxidase-like Activity of Yolk-shell Co<sub>3</sub>S<sub>4</sub> Microspheres for Detection**  
4 **of Hg<sup>2+</sup>**

5  
6 **Kang Qin<sup>b</sup>, Ying Chu<sup>b</sup>, Chang Xu<sup>b</sup>, Guijiang Li<sup>b</sup>, Xixi Zhu<sup>b</sup>, Gaochao Fan<sup>c</sup>**  
7 **Zhongdong Yang<sup>a,\*</sup> and Qingyun Liu<sup>b,\*</sup>**

8  
9 *<sup>a</sup> Shandong University of Science and Technology Hospital, Shandong University of*  
10 *Science and Technology, Qingdao 266590, China*

11 *<sup>b</sup> College of Chemical and Biological Engineering, Shandong University of Science*  
12 *and Technology, Qingdao 266590, China*

13 *<sup>c</sup> Shandong Key Laboratory of Biochemical Analysis, College of Chemistry and*  
14 *Molecular Engineering, Qingdao University of Science and Technology, Qingdao*  
15 *266042, China*

16 **\* Corresponding Author**

17 E-mail: skd994016@sdust.edu.cn (Z. Yang); qyliu@sdust.edu.cn(Q. Liu)

18 Tel: +86 0532 86057757

19 **Number of pages: 14**

20 **Number of Figures: 11**

21 **Number of Tables: 2**

22 **Number of Videos: 1**

## 23 **Associated Content**

24 Experimental Section (Materials, Instruments, Preparation of  $\text{Co}_3\text{S}_4$  yolk-shell  
25 microspheres, Assay of the peroxidase-like activity of  $\text{Co}_3\text{S}_4$ , Steady-state kinetics,  
26 Assay of the oxidase-like activity, Assay of detection of  $\text{Hg}^{2+}$ );  
27 XRD pattern of  $\text{Co}_3\text{S}_4$  microspheres (a), SEM image of precursor (b), SEM image of  
28  $\text{Co}_3\text{S}_4$  (c), and TEM image of  $\text{Co}_3\text{S}_4$  (d) (Fig. S1);  
29 BET data of  $\text{Co}_3\text{S}_4$  yolk-shell spheres (Fig. S2);  
30 Assay of catalytic activity of  $\text{Co}_3\text{S}_4$  (Fig. S3);  
31 (a) Assay of the peroxidase-like activity of  $\text{Co}_3\text{S}_4$ , (b) Fluorescence intensity, (c) and  
32 (d) ESR data of  $\text{Co}_3\text{S}_4$  (Fig. S4);  
33 Assay of the oxidase-like activity of  $\text{Co}_3\text{S}_4$  (Fig. S5);  
34 Steady-state kinetic (Fig. S6);  
35 Assay of the oxidase-like activity (Fig. S7);  
36 TEM image of  $\text{HgS}/\text{Co}_3\text{S}_4$  (a), XRD data of  $\text{Co}_3\text{S}_4$  and  $\text{HgS}/\text{Co}_3\text{S}_4$  (b), and TEM-EDX  
37 mapping images of  $\text{HgS}/\text{Co}_3\text{S}_4$  (c) (Fig. S8);  
38 XPS spectra of  $\text{Co}_3\text{S}_4$  and  $\text{HgS}/\text{Co}_3\text{S}_4$  (Fig. S9);  
39 (a) and (b) Assay of the oxidase-like activity, (c) ESR data of  $\text{HgS}/\text{Co}_3\text{S}_4$  (Fig. S10);  
40 Selectivity of sensor (Fig. S11);  
41 Comparison of  $K_m$  (Table S1);  
42 Comparison of  $\text{Hg}^{2+}$  detection (Table S2);  
43 Color changes of the reaction systems in the presence of  $\text{Hg}^{2+}$  or in the absence of  
44  $\text{Hg}^{2+}$  (Video S1).

## 45 **Experimental Section**

### 46 **Materials**

47 HgCl<sub>2</sub>, thioacetamide (TAA) and 3,3',5,5'-tetramethylbenzidine dihydrochloride  
48 (TMB) were commercially purchased from Macklin (Shanghai, China).  
49 Fe(NO<sub>3</sub>)<sub>3</sub>•9H<sub>2</sub>O, Co(NO<sub>3</sub>)<sub>2</sub>•6H<sub>2</sub>O, NaCl, KCl, MgSO<sub>4</sub>, H<sub>2</sub>O<sub>2</sub> (30 wt%), Terephthalic  
50 acid, disodium ethylenediaminetetraacetic acid (EDTA-2Na), Lactose (Lac), D-  
51 histidine (Hi), isopropanol (IPA), p-benzoquinone (PBQ), Dserine (Ser), L-arginine  
52 (Arg), and Sucrose (Suc) were obtained from Sinopharm Chemical Reagent Co., Ltd.  
53 (Shanghai, China).

### 54 **Instruments**

55 The surface state of elements and the phase of Co<sub>3</sub>S<sub>4</sub> yolk-shell microspheres  
56 were systematically characterized by X-ray photoelectron spectroscopy (XPS,  
57 Thermo ESCALAB 250Xi, USA) and X-ray diffractometer (Cu-K $\alpha$  radiation, 2 $\theta$  =  
58 10-80°, 5°/min), respectively. The morphology was investigated by the transmission  
59 electron microscope with the energy dispersive X-ray spectroscopy (TEM, FEI,  
60 APREO, USA). Fluorescent spectra and UV–vis absorption spectra were recorded on  
61 a fluorescence spectrophotometer (FL, Hitachi F-4600, Japan) and a UV-8000PC  
62 spectrophotometer (Puxi, TU 1810, China), respectively. The Bru-nauer-Emmett-  
63 Teller surface were analyzed on a Micromeritics ASAP 2460 at 77.3 K.

### 64 **Preparation of Co<sub>3</sub>S<sub>4</sub> yolk-shell microspheres**

65 In a typical synthesis process, 0.2734 g Co(NO<sub>3</sub>)<sub>2</sub>•6H<sub>2</sub>O were dissolved in the  
66 mixed solvents glycerol (7.5 mL) and isopropanol (52.5 mL) resulting a clear pink

67 solution. The formed mixture was then transferred into Teflon-sealed autoclave and  
68 heated at 150 °C for 24 h. Natural cooling to room temperature, the purple precipitate  
69 was obtained via centrifugation, rinsed with absolute ethanol six times and dried at 60  
70 °C.

71 For the synthesis of hollow  $\text{Co}_3\text{S}_4$  yolk-shell microspheres, 0.0300 g purple  
72 precipitate was dispersed into 20.0 mL ethanol solution including 0.0500 g  
73 thioacetamide (TAA). Then, the resulting solution was sealed in Teflon-sealed  
74 autoclave and performed at 180 °C for 12 h. After centrifugation and rinsed with  
75 distilled water and ethanol several times, the hollow  $\text{Co}_3\text{S}_4$  coreshell nanospheres  
76 were finally synthesized.<sup>1</sup>

#### 77 **Assay of the peroxidase-like activity of $\text{Co}_3\text{S}_4$**

78 Typically, 200  $\mu\text{L}$  of  $\text{Co}_3\text{S}_4$  aqueous suspension, 200  $\mu\text{L}$  of  $\text{H}_2\text{O}_2$  and 200  $\mu\text{L}$  of  
79 TMB were added into 1400  $\mu\text{L}$  buffer solution in turn, and the absorbance at 652 nm  
80 was recorded after reaction for 2 min. The optimal catalytic conditions of the  $\text{Co}_3\text{S}_4$   
81 nanozyme were evaluated by tuning pH values of buffer solutions as well as the  
82 various temperatures.

#### 83 **Steady-state kinetics**

84 The catalytic kinetics of  $\text{Co}_3\text{S}_4$  dual nanozymes was studied by changing the  
85 concentration of the substrates TMB or  $\text{H}_2\text{O}_2$ , and keep the other unchanged,  
86 respectively. Herein, the kinetic study was carried out using 200  $\mu\text{L}$  of  $\text{Co}_3\text{S}_4$   
87 microspheres (0.3 mg/mL) in a reaction volume of 200  $\mu\text{L}$  with 0.1 mM TMB or 25  
88 mM  $\text{H}_2\text{O}_2$ .  $K_m$  and  $V_{\max}$  were calculated by the double reciprocal graph of the

89 Michaelis-Menten equation, that is,  $1/v = (K_m/V_{max}) \times (1/[S]) + 1/V_{max}$ , where  $V_{max}$   
90 and  $v$  represent the maximum reaction velocity and initial speed, as well as  $[S]$  and  
91  $K_m$  represent the substrate concentration and Michaelis constant, respectively.

## 92 **Assay of the oxidase-like activity**

93 Briefly, 200  $\mu\text{L}$  of  $\text{Co}_3\text{S}_4$ , 200  $\mu\text{L}$  of  $\text{Hg}^{2+}$  and 200  $\mu\text{L}$  of TMB were added into  
94 1400  $\mu\text{L}$  buffer solution reacted for 2 min, and the absorbance at 652 nm was  
95 recorded. Similar to the study of peroxidase-like activity of  $\text{Co}_3\text{S}_4$ , it was necessary to  
96 study the influences of the experimental temperatures and pH values on the oxidase-  
97 like activity.

## 98 **Assay of detection of $\text{Hg}^{2+}$**

### 99 **Colorimetric $\text{Hg}^{2+}$ detection based on the peroxidase-like activity of $\text{Co}_3\text{S}_4$**

100 Firstly, different concentrations of  $\text{Hg}^{2+}$  (200  $\mu\text{L}$ ) and peroxidase-like nanozyme  
101  $\text{Co}_3\text{S}_4$  (200  $\mu\text{L}$ , 0.3 mg/mL) were added to HAc-NaAc buffer (pH = 4) and incubated  
102 at room temperature for 2 min. Then, add  $\text{H}_2\text{O}_2$  (1 mM, 200  $\mu\text{L}$ ) together with TMB  
103 (0.1 mM, 200  $\mu\text{L}$ ) into the above mixture reacted for 2 min and report the absorbance  
104 at 652 nm.

### 105 **Colorimetric $\text{Hg}^{2+}$ detection based on the oxidase-like activity of $\text{Co}_3\text{S}_4$**

106 Different concentrations of  $\text{Hg}^{2+}$  (200  $\mu\text{L}$ ),  $\text{Co}_3\text{S}_4$  (200  $\mu\text{L}$ , 0.3 mg/mL) and TMB  
107 (0.1 mM, 200  $\mu\text{L}$ ) were added into HAC-NaAC buffer (pH = 5), which was incubated  
108 at room temperature for 2 min. Then, the absorbance at 652 nm was reported.

## 109 **XPS spectra of $\text{HgS}/\text{Co}_3\text{S}_4$**

110 From Fig. S9a, the elements Hg, Co, and S are detected in the final production

111 HgS/Co<sub>3</sub>S<sub>4</sub>. The Co 2p peak in HgS/Co<sub>3</sub>S<sub>4</sub> shows a positive shift of 1.0 eV due to the  
112 influence of the introduced Hg<sup>2+</sup> (Fig. S9b). The typical peaks centered at 161.4 and  
113 162.2 eV are S 2p<sub>1/2</sub> and S 2p<sub>3/2</sub>, respectively, indicating that the oxidation state of  
114 S<sup>2-</sup> exists in Co<sub>3</sub>S<sub>4</sub> (Fig. S9c). <sup>2</sup> For HgS/Co<sub>3</sub>S<sub>4</sub>, a decrease in the main peak at 165.9  
115 eV is detected (Fig. S9c), indicating the influence of the produced HgS. In addition, as  
116 seen from Fig. S9d, two peaks at 100.22 and 104.22 eV in HgS/Co<sub>3</sub>S<sub>4</sub> indicate that Hg  
117 mainly exists in the 2+ oxidation state. <sup>3</sup> Thereof, it can be suggested that the  
118 produced HgS is attached to Co<sub>3</sub>S<sub>4</sub> subsequently.

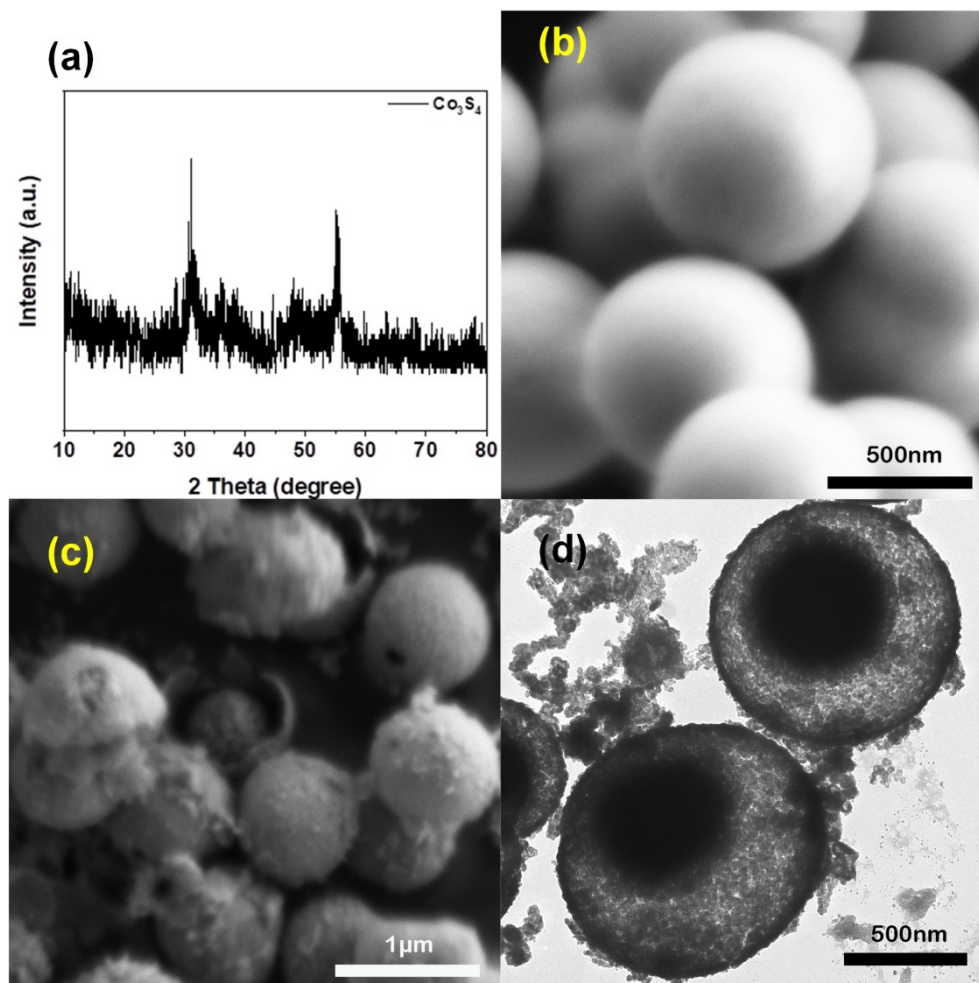

120

121 **Fig. S1** XRD pattern of  $\text{Co}_3\text{S}_4$  microspheres(a); SEM image of precursor (b); Images of SEM (c)

122 and TEM (d) of yolk-shell  $\text{Co}_3\text{S}_4$

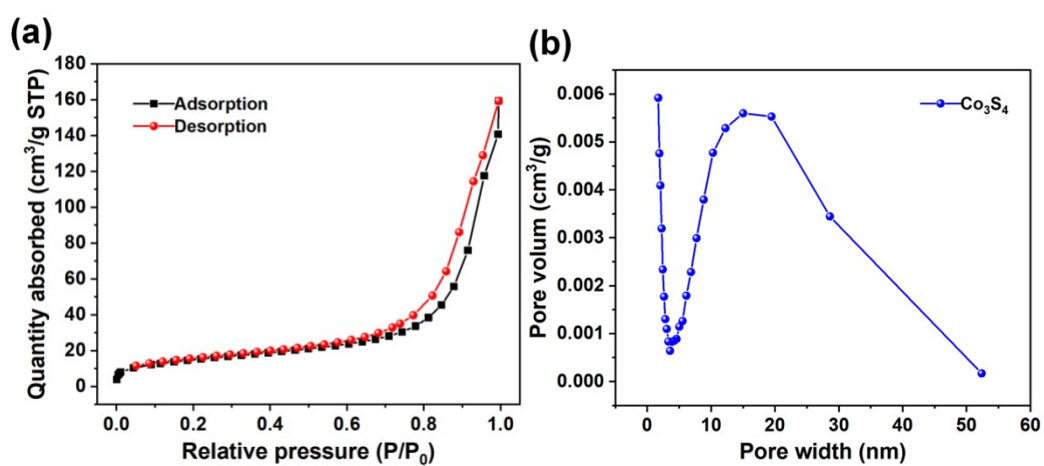

123

124 **Fig. S2**  $\text{N}_2$  adsorption/desorption isotherms (a) and the pore volume (b) of  $\text{Co}_3\text{S}_4$  yolk-shell

125 spheres.

126

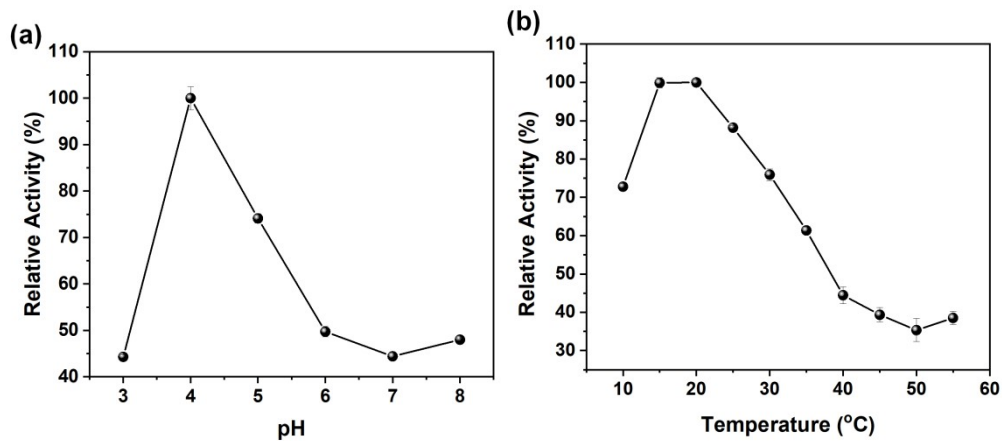

127

128 **Fig. S3** Influences of the catalytic activity of  $\text{Co}_3\text{S}_4$  on pH (a) and temperature (b), respectively.

129

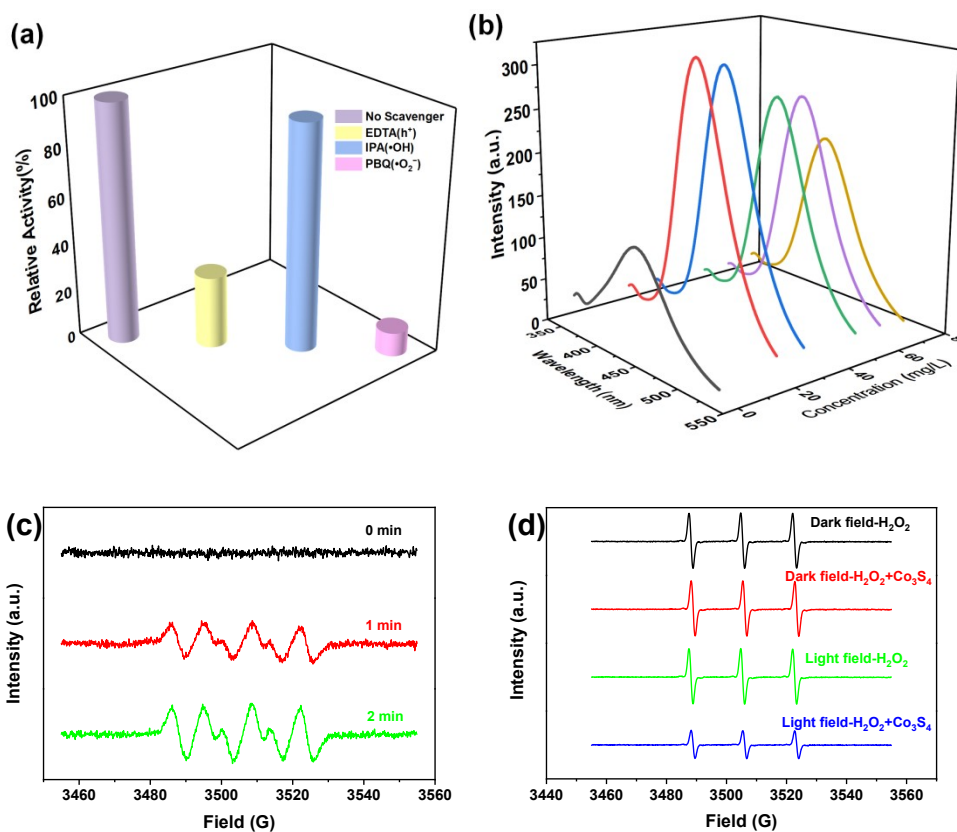

130

131

132 **Fig. S4** (a) Effects of various active scavengers during the catalytic oxidation of TMB by  $\text{Co}_3\text{S}_4$

133 under natural light. (b) Fluorescence intensity varies with the amount of  $\text{Co}_3\text{S}_4$ . Fluorescent tests:

134  $\text{Co}_3\text{S}_4$  as catalyst,  $\text{H}_2\text{O}_2$  24 mM, TA 0.5 mM, pH of 4, 20 °C, 30 min. (c) Generation of  $\cdot\text{O}_2^-$  by

135  $\text{Co}_3\text{S}_4$  nanozymes in the presence of 1mM  $\text{H}_2\text{O}_2$  (methanol system), and (d) photogenerated hole



136 in water system.

137

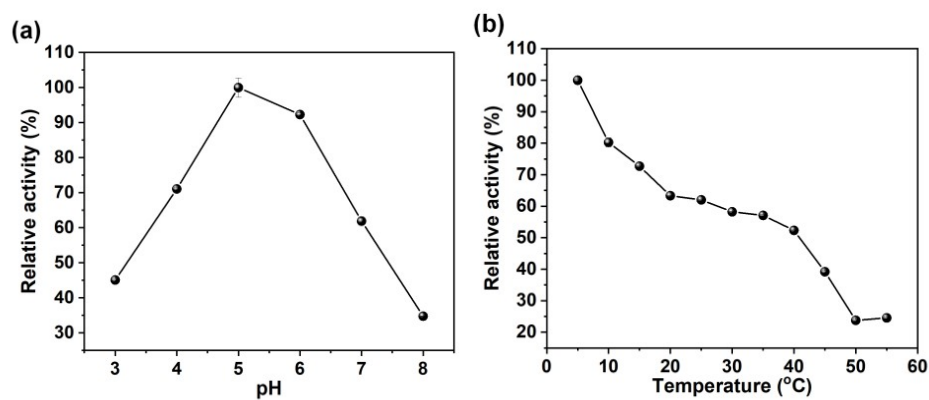

138

139 **Fig. S5** Influences of pH (a) and temperature (b) on the oxidase-like activity of  $\text{Co}_3\text{S}_4$ ,

140 respectively.

141

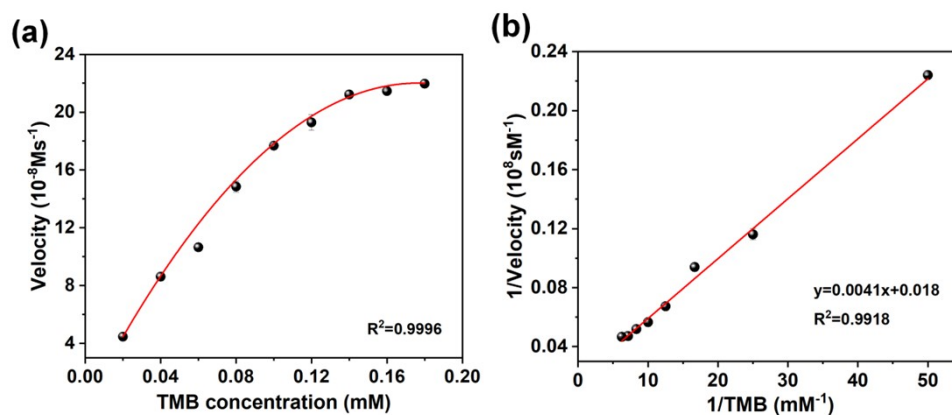

142

143 **Fig. S6** Steady-state kinetic assay of  $\text{Hg}^{2+}$  triggered “ON”  $\text{Co}_3\text{S}_4$  oxidase-like activity by (a)

144 varying the concentrations of TMB from 20 to 200  $\mu\text{M}$  with a fixed amount of  $\text{Hg}^{2+}$  (1 mM) (b) is

145 corresponding double reciprocal curve towards TMB.

146

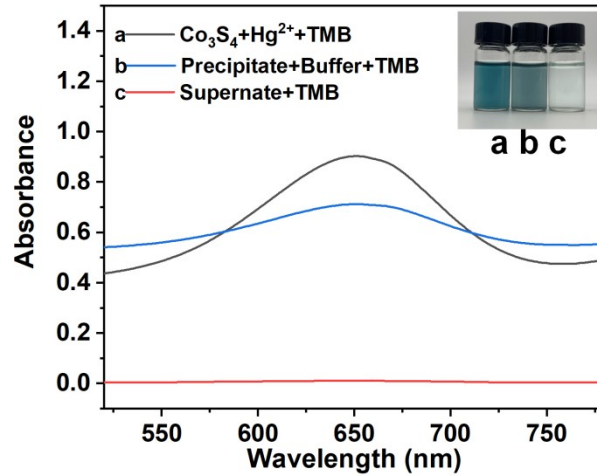

147

148 **Fig. S7** Comparison of the oxidase-like activity whether precipitate ( $\text{HgS}/\text{Co}_3\text{S}_4$ ) or supernate

149 taken from the reaction system after  $\text{Hg}^{2+}$  mixed with  $\text{Co}_3\text{S}_4$  under natural light.

150

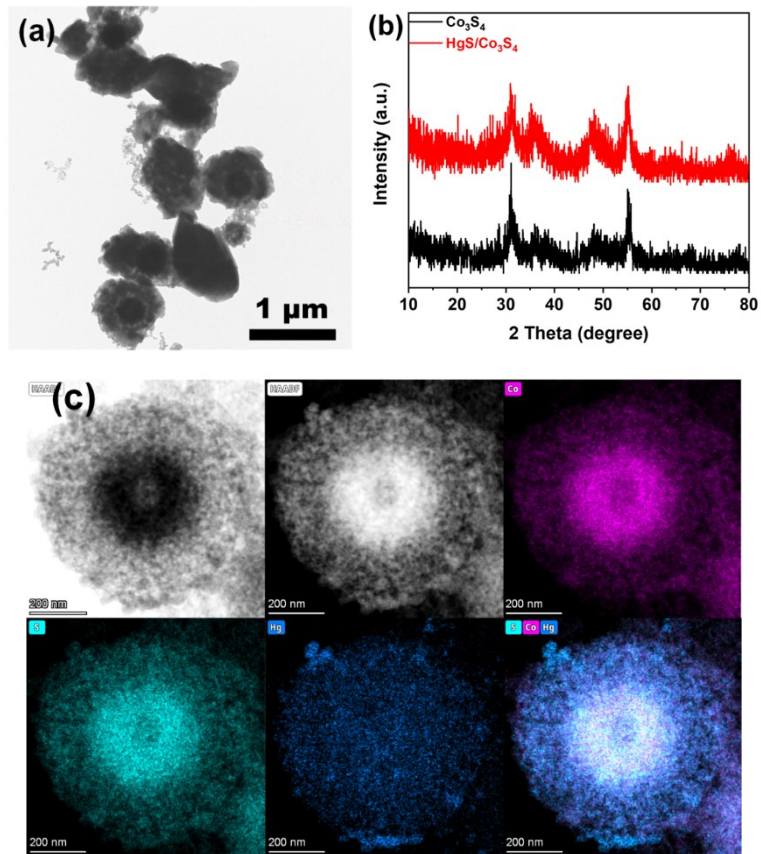

151

152

153 **Fig. S8** TEM image of  $\text{HgS}/\text{Co}_3\text{S}_4$  (a), XRD data of  $\text{Co}_3\text{S}_4$  and  $\text{HgS}/\text{Co}_3\text{S}_4$  (b), and TEM-EDX

154 mapping images of  $\text{HgS}/\text{Co}_3\text{S}_4$  (c), respectively.

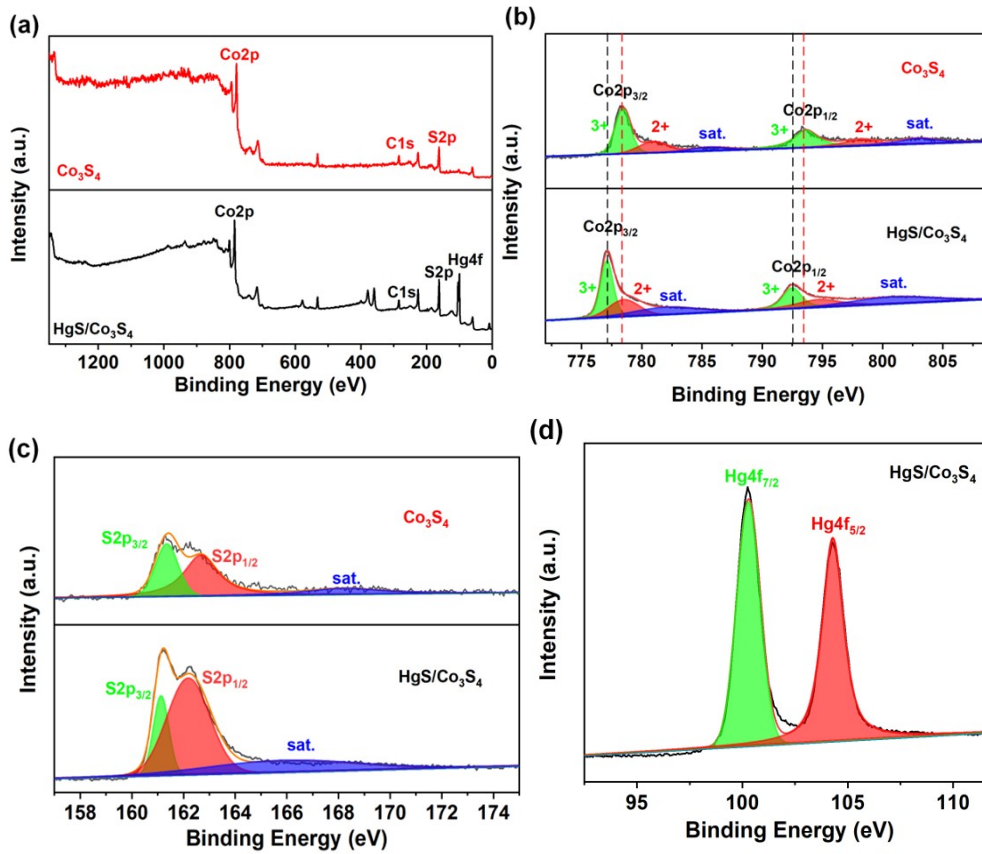

155

156

157 **Fig. S9** High-resolution XPS spectra of  $\text{Co}_3\text{S}_4$  and  $\text{HgS}/\text{Co}_3\text{S}_4$ : survey (a), Co 2p (b), S 2p (c) and

158 Hg 4f (d), respectively.

159

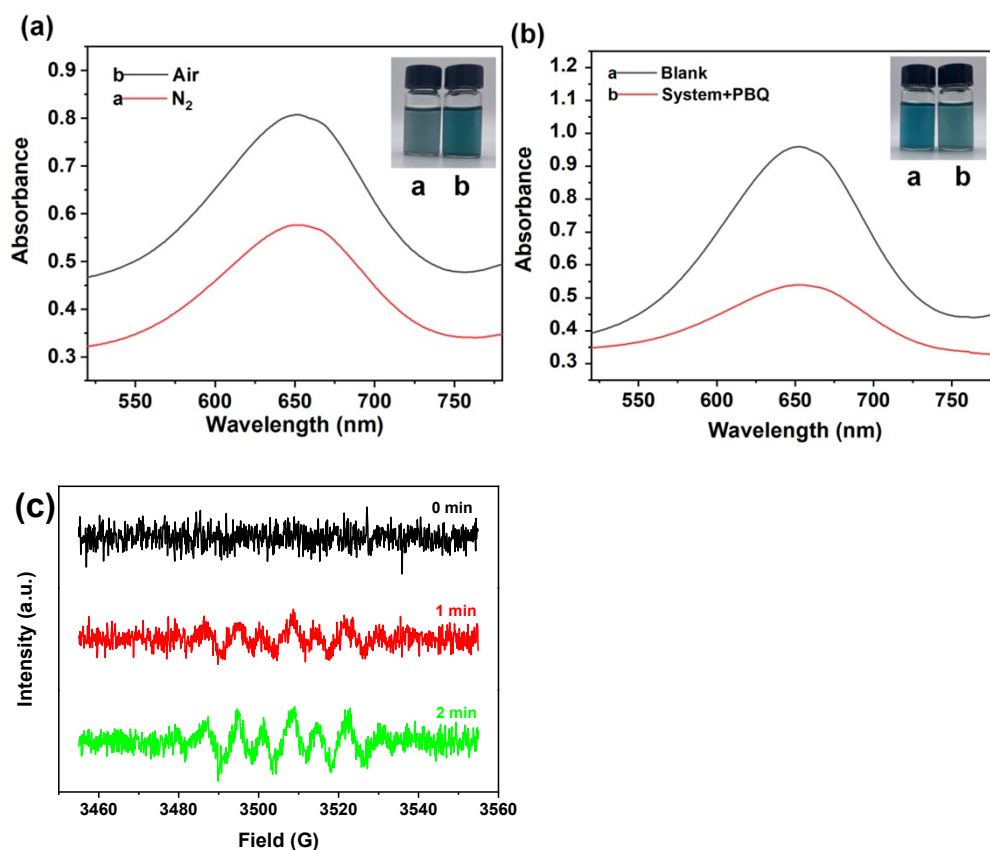

160

161

162 **Fig. S10** (a) The influences on the oxidase-like activity of Hg-Co<sub>3</sub>S<sub>4</sub> under air-saturated or N<sub>2</sub>-  
 163 saturated conditions (inset: the corresponding photographs); (b) In the presence or absence of PBQ.

164 (c) Generation of •O<sub>2</sub><sup>-</sup> by HgS/Co<sub>3</sub>S<sub>4</sub> without the presence of H<sub>2</sub>O<sub>2</sub> (methanol system).

165

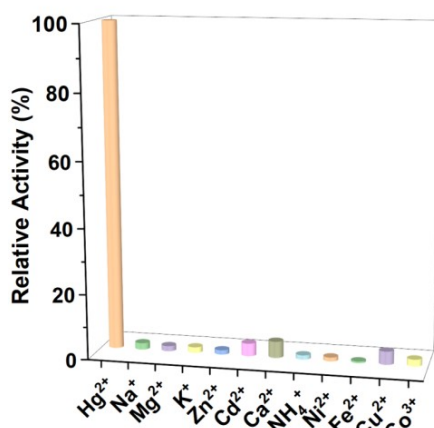

166

167 **Fig. S11** The selectivity of the Co<sub>3</sub>S<sub>4</sub>-based sensor towards Hg<sup>2+</sup> (1.0 mM) in the presence of  
 168 interferents (100 mM).

170 **Table S1** Comparison of  $K_m$  of nanozymes towards TMB substrate.

| Nanozymes                                                  | $K_m$ /mM | Ref.      |
|------------------------------------------------------------|-----------|-----------|
| Co-V MMO (oxidase)                                         | 0.44      | 4         |
| CeO <sub>2</sub> (oxidase)                                 | 0.80      | 5         |
| Selenium (oxidase)                                         | 8.30      | 6         |
| Co <sub>3</sub> S <sub>4</sub> (peroxidase)                | 0.82      | This work |
| Co <sub>3</sub> S <sub>4</sub> -Hg <sup>2+</sup> (oxidase) | 0.22      | This work |

171

172 **Table S2** Comparison of Hg<sup>2+</sup> detection based on Hg<sup>2+</sup>-triggered Co<sub>3</sub>S<sub>4</sub> oxidase-like activity with  
173 the previous studies.

| Nanozymes                                                  | LOD (nM) | Ref.      |
|------------------------------------------------------------|----------|-----------|
| GO-Ag (fluorimetric)                                       | 590      | 7         |
| Ag/GO (colorimetric)                                       | 338      | 8         |
| p-PDA/Ag(colorimetric)                                     | 800      | 9         |
| Ficuscaricastem-Ag(colorimetric)                           | 1060     | 10        |
| Co <sub>3</sub> S <sub>4</sub> (peroxidase)                | 170      | This work |
| Co <sub>3</sub> S <sub>4</sub> -Hg <sup>2+</sup> (oxidase) | 55       | This work |

174

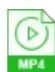

video.mp4

175

176 **Video S1** Color changes of the reaction systems in the presence of Hg<sup>2+</sup> or in the absence of Hg<sup>2+</sup>.

177 **Left system:** Buffer solution (pH = 4), Co<sub>3</sub>S<sub>4</sub> (0.3 mg/L), TMB (1 mM) and Hg<sup>2+</sup> (1 mM).

178 **Right system:** Buffer solution (pH = 4), Co<sub>3</sub>S<sub>4</sub> (0.3 mg/L) and TMB (1 mM).

179

## 180 **References**

- 181 1. L. Shen, L. Yu, H. B. Wu, X.-Y. Yu, X. Zhang and X. W. Lou, *Nature Communications*, 2015, **6**.
- 182 2. H. Chen, J. Jiang, L. Zhang, H. Wan, T. Qi and D. Xia, *Nanoscale*, 2013, **5**, 8879-8883.
- 183 3. J. S. Lee, M. S. Han and C. A. Mirkin, *Angew Chem Int Ed Engl*, 2007, **46**, 4093-4096.

- 184 4. Y. Wang, C. Chen, D. Zhang and J. Wang, *Applied Catalysis B: Environmental*, 2020, **261**.
- 185 5. A. Asati, S. Santra, C. Kaittanis, S. Nath and J. M. Perez, *Angew Chem Int Ed Engl*, 2009, **48**,  
186 2308-2312.
- 187 6. L. Guo, K. Huang and H. Liu, *Journal of Nanoparticle Research*, 2016, **18**.
- 188 7. S. D. Hiremath, K. K. Maiti, N. N. Ghosh, M. Banerjee and A. Chatterjee, *ACS Applied Nano*  
189 *Materials*, 2020, **3**, 3071-3079.
- 190 8. A. Syed, N. Marraiki, S. Al-Rashed, A. M. Elgorban and M. T. Yassin, *Spectrochim Acta A Mol*  
191 *Biomol Spectrosc*, 2021, **244**, 118844.
- 192 9. A. Kalam, A. G. Al-Sehemi, S. Alrumman, M. Assiri, M. F. M. Moustafa, P. Yadav and M.  
193 Pannipara, *Green Chemistry Letters and Reviews*, 2018, **11**, 484-491.
- 194 10. S. A. Pande, B. Pandit and B. R. Sankapal, *Materials Letters*, 2017, **209**, 97-101.
- 195
